# Supplementary material
Source: ML conference proceedings conference paper supplement (https://openaccess.thecvf.com/content/ICCV2025/html/Carr_Privacy-centric_Deep_Motion_ICCV_2025_paper.html)
Supplement: Supplementary file 1 [file Carr_Privacy-centric_Deep_Motion_ICCV_2025_supplemental.pdf]

# Privacy-centric Deep Motion Retargeting for Anonymization of Skeleton-Based Motion Visualization (Supplementary Materials)

## S1. Implementation Details

Our model was implemented in PyTorch and experiments were conducted on a server with two NVIDIA GeForce RTX 3090's and an AMD Threadripper 3960x CPU (64 GB RAM). We utilize the Adam optimizer for the auto-encoder portion, the embedding classifiers, and the discriminator. The PMR models boasts an inference time is 0.006s for 75 frames ( $\sim 2.5s$ ) of motion video. The training complexity is  $\sim 1.5\times$  that of the DMR model due to the adversarial/cooperative learning components. The final model took 6.5 hours to train.

### S1.1. Model Architecture

Table S1 shows our PyTorch implementation of the encoders, decoder, embedding classifiers, and the quality controller, where the acronyms are explained in Table S2. The embeddings size is (256, 32).

### S1.2. Training Stages

Table S3 details the epochs and stages of training. Initial pre-training primes the models briefly. The first two stages utilize paired and unpaired data for embedding separation. The next two stages ready the embedding classifiers for iterative cooperative and adversarial training. In the unpaired stage, the model is learning how motion data works and learns how to break down and reconstruct the skeletons. Most of the emphasis is put on the paired training, where the motion retargeting is fine-tuned.

### S1.3. DMR Baseline Implementation

Since the original DMR was designed for animation datasets (e.g., Mixamo), we adapted it for real-world capture data:

- Re-implemented the character-agnostic variant following official code
- Added loss components from the skeleton-aware variant to handle NTU's noisy real-capture data
- Used same data preprocessing pipeline as PMR for fair comparison
- Training hyperparameters: learning rate 0.001, batch size 64, 200 epochs

## S2. Dataset Analysis

A major difference in our experiment versus those in standard motion retargeting is that our data is imperfect. Other datasets like Mixamo, as used in PMR, are great for motion retargeting training as all the actors complete actions in the same way. Additionally, the data is created and not captured, leaving much less noise. In a real-world dataset, such as NTU, actors complete the task how they would normally do them. Environments could also be different, some may be closer to the camera, some may complete the task faster or slower. Identifiable information is captured in just the way someone completes a task. The data has individualistic ways the tasks are completed, which makes it perfect for evaluating the privacy, but may have flaws in the retargeting. This becomes especially notable in the cross-reconstruction loss  $L_{cross}$ .

## S3. Privacy-Utility Trade-off

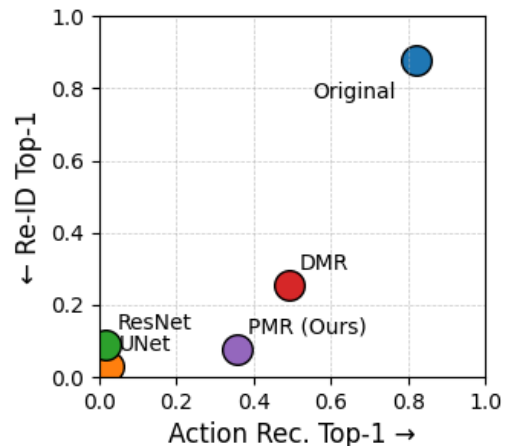

Figure S1. Privacy-utility trade-off on NTU-60. The plot shows re-identification accuracy (privacy risk) vs. action recognition accuracy (utility). PMR achieves the best balance, positioned closest to the lower-right corner (low privacy risk, high utility).

| Name                                     | Layers                | k   | s | p | in/out   |
|------------------------------------------|-----------------------|-----|---|---|----------|
| Encoder                                  | C2D + LR + MP + RP2D  | 3x3 | 1 | - | 75/12    |
|                                          | C2D + LR + MP + RP2D  | 3x3 | 1 | - | 12/24    |
|                                          | C2D + LR + MP + RP2D  | 3x3 | 1 | - | 24/32    |
|                                          | C2D + LR + MP + RP2D  | 3x3 | 1 | - | 32/256   |
| Decoder                                  | CT2D + LR + Up + RP2D | 3x3 | 1 | 1 | 512/ 256 |
|                                          | CT2D + LR + Up + RP2D | 3x3 | 1 | 1 | 256/128  |
|                                          | CT2D + LR + Up + RP2D | 3x3 | 1 | 1 | 128/96   |
|                                          | CT2D + LR + Up + RP2D | 3x3 | 1 | 1 | 96/75    |
| Embedding<br>Classifier                  | CT1D + BN + R         | 3   | 1 | 1 | 256/128  |
|                                          | CT1D + BN + R         | 3   | 1 | 1 | 128/256  |
|                                          | CT1D + BN + R + AP    | 3   | 1 | 1 | 256/512  |
|                                          | FL + LR + R           | -   | - | - | 512/1024 |
|                                          | LR + R                | -   | - | - | 1024/512 |
|                                          | LR + R + SM           | -   | - | - | 512/Y    |
| Quality<br>Controller<br>(Discriminator) | CT1D + LR + Up + RP1D | 3   | 1 | 1 | T/64     |
|                                          | CT1D + LR + Up + RP1D | 3   | 1 | 1 | 64/32    |
|                                          | CT1D + LR + Up + RP1D | 3   | 1 | 1 | 32/16    |
|                                          | CT1D + LR + Up + RP1D | 3   | 1 | 1 | 16/8     |
|                                          | FL + LR + R           | -   | - | - | 80/32    |
|                                          | LR + Sig              | -   | - | - | 32/1     |

Table S1. Model Implementations. **k** represents kernel size, **s** represents stride, and **p** represents padding.

| Acronym | Definition                    |
|---------|-------------------------------|
| C2D     | Convolutional 2D              |
| CT2D/1D | Convolutional Transpose 2D/1D |
| LR      | Leaky ReLU                    |
| R       | ReLU                          |
| Up      | Upsample                      |
| MP/AP   | Max/Average Pooling           |
| RP/2D   | Reflection Pad/2D             |
| MLP     | Multi-Layer Perceptron        |
| BN      | Batch Normalization           |
| Y       | Number of classes             |
| FL      | Flatten                       |
| SM      | Softmax                       |
| Sig     | Sigmoid                       |

Table S2. Definitions of Acronyms Used

| Stage                                  | Paired | Epochs |
|----------------------------------------|--------|--------|
| Pre-training the Auto-Encoder          | Yes    | 5      |
| Pre-training the Auto-Encoder          | No     | 20     |
| Pre-training the Embedding Classifiers | Yes    | 20     |
| Pre-training the Embedding Classifiers | No     | 50     |
| Unpaired                               | No     | 100    |
| Paired Training                        | Yes    | 100    |

Table S3. Training stages used for final model

## S4. Task Specific Metrics

In many deployment scenarios, one may only need to preserve discriminative accuracy on *certain critical actions*, rather than all classes. For example, healthcare or assisted living might focus on fall detection. We therefore measure **per-class F1** on a subset of medically or safety-relevant actions from the NTU-60 dataset:

- **Falling Down** (A43),
- **Staggering** (A42),
- **Chest Pain** (A45),
- **Headache** (A44).

| Method     | Class-level F1 |         |            |          |
|------------|----------------|---------|------------|----------|
|            | Falling        | Stagger | Chest Pain | Headache |
| Original   | 0.965          | 0.981   | 0.905      | 0.884    |
| DMR        | 0.999          | 0.814   | 0.676      | 0.491    |
| PMR (Ours) | 0.974          | 0.981   | 0.905      | 0.884    |

Table S4. Per-class accuracy and F1 for selected medical-related actions on NTU-60. PMR and DMR are reasonably close on these key actions, while PMR drastically lowers re-ID (shown in the main paper).

Table S4 shows that both PMR and DMR degrade performance vs. the original skeleton (which is expected, since retargeting can alter nuance). Nevertheless, PMR still achieves fairly strong detection of these critical classes, at

only a modest cost in F1 relative to DMR. Meanwhile, PMR’s re-ID remains below 8–10%, whereas DMR’s is  $\sim 25\%$ . In a safety-oriented application where privacy is paramount, PMR offers a compelling balance.

## S5. Visualizations

Figure S2 shows another example (“Type on a Keyboard”) from NTU-60. Figure S3 shows the anonymization results for the “Apply Cream on Hand” action from NTU-120. The Moon paper was only trained on NTU60 and could not be fairly tested for the “Apply Cream on Hand” action. Additionally, provided in the GitHub are GIF files demonstrating the frame by frame movement. These GIFs are rendered in 30 fps to align with the capture rate from the NTU dataset.

## S6. Embedding Classifier Accuracy

Figure S4 illustrates the privacy classifier’s accuracy on training and validation on the primary training on the NTU60 dataset. Red and green lines represent accuracy on the privacy embedding, whereas blue and purple lines show accuracy on the motion embedding. The aim is low performance on the motion embedding, indicating minimal PII presence.

Figure S5 displays the utility classifier’s accuracy in training and validation on the primary training on the NTU60 dataset. Here, red and green lines indicate accuracy on the motion embedding, focusing on the skeleton’s utility. Blue and purple lines represent performance on the privacy embedding. The goal is high accuracy on the motion embedding and low on the privacy embedding, ensuring motion information exclusivity.

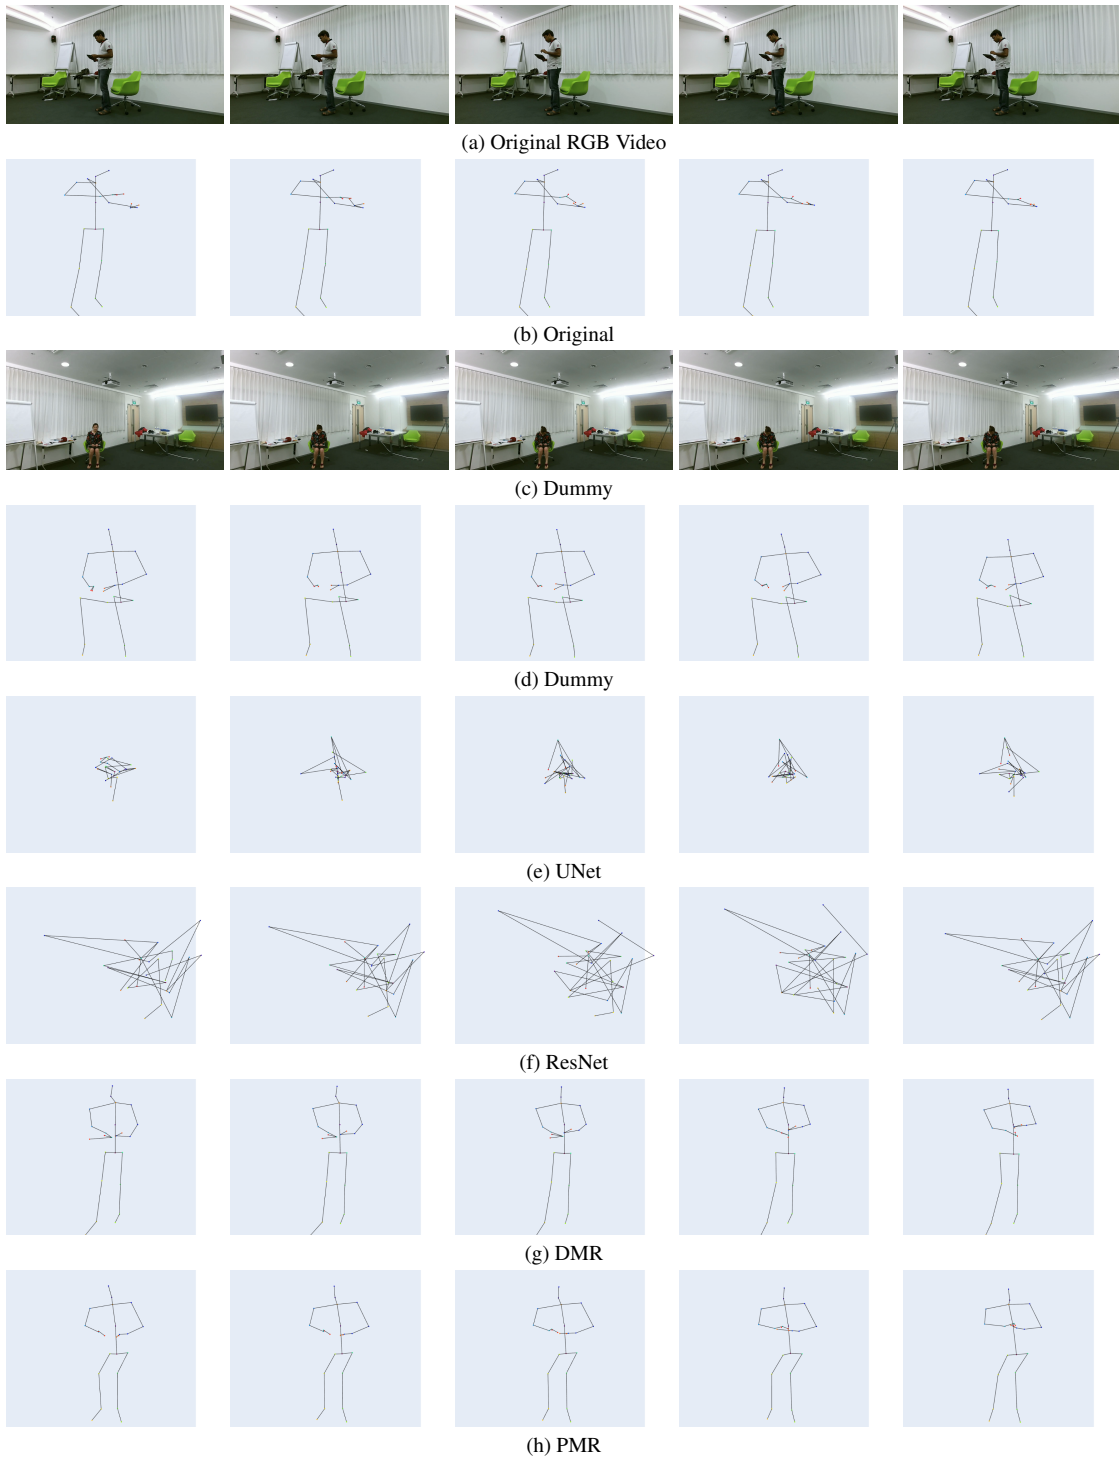

Figure S2. Example visualization: Actor 19 performing the "Type on a Keyboard" action, cast to Actor 36. The PMR model attempts to make the generated skeleton sit, while maintaining end-effector positioning.



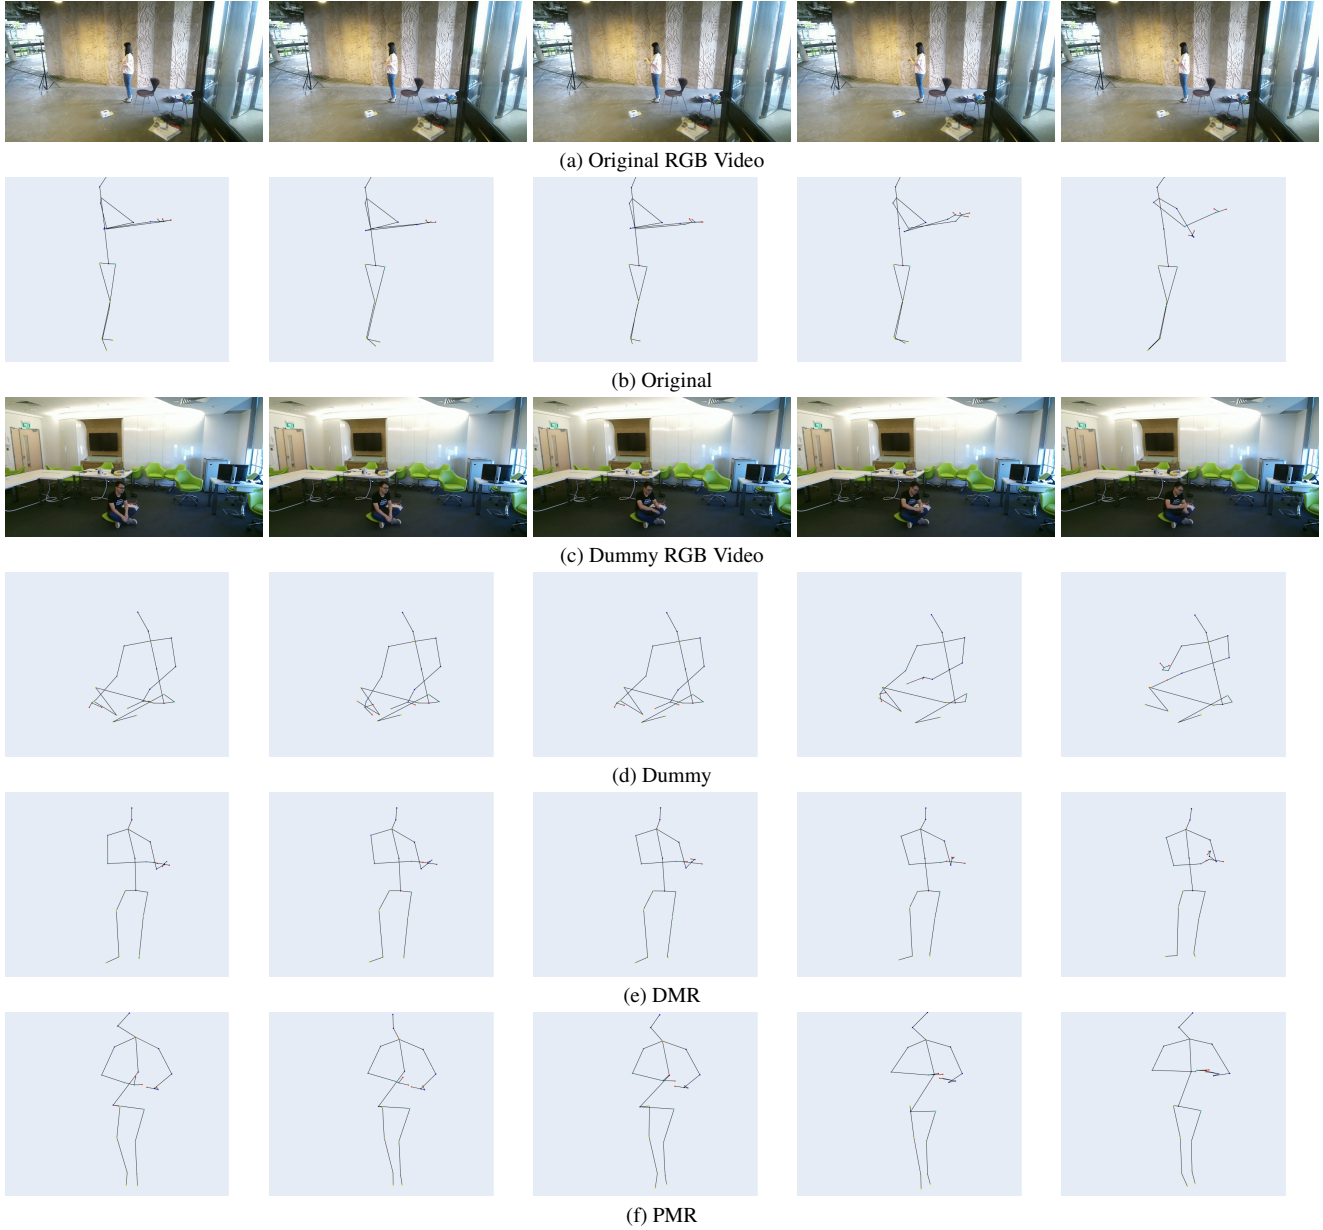

Figure S3. Example visualization: Actor 61 performing the "Apply Cream on Hand" action, cast to Actor 8. PMR makes the generated skeleton sit and places arms similarly to that of the dummy, preserving the privacy of the original sequence.

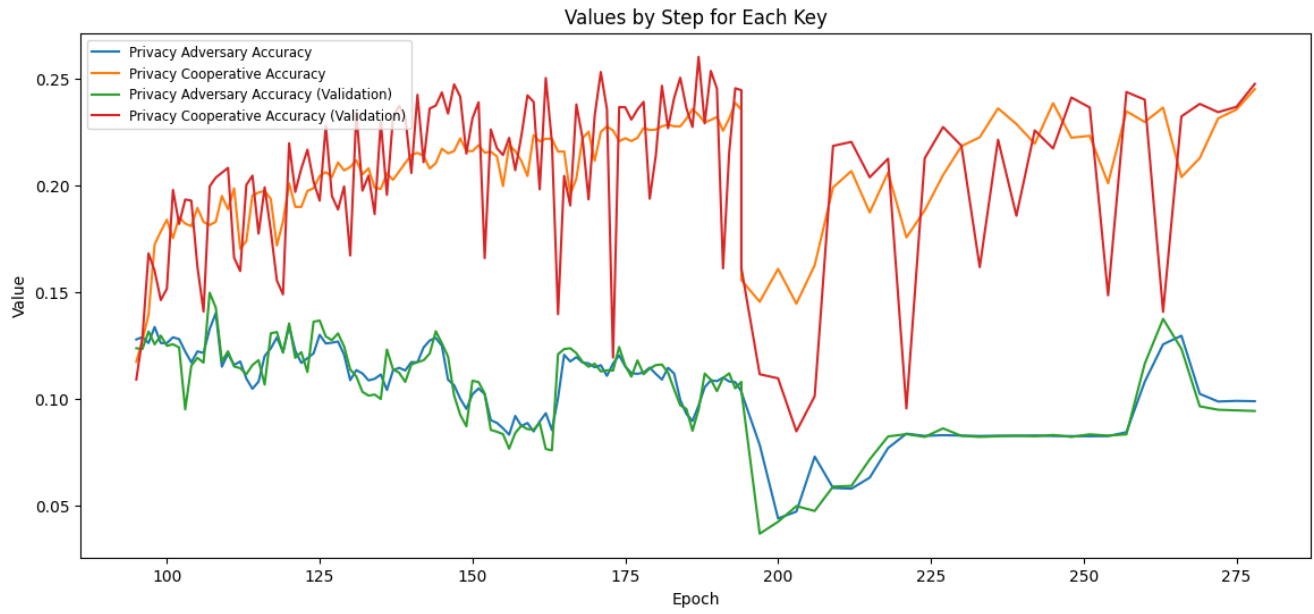

Figure S4. Privacy Classifier Accuracy

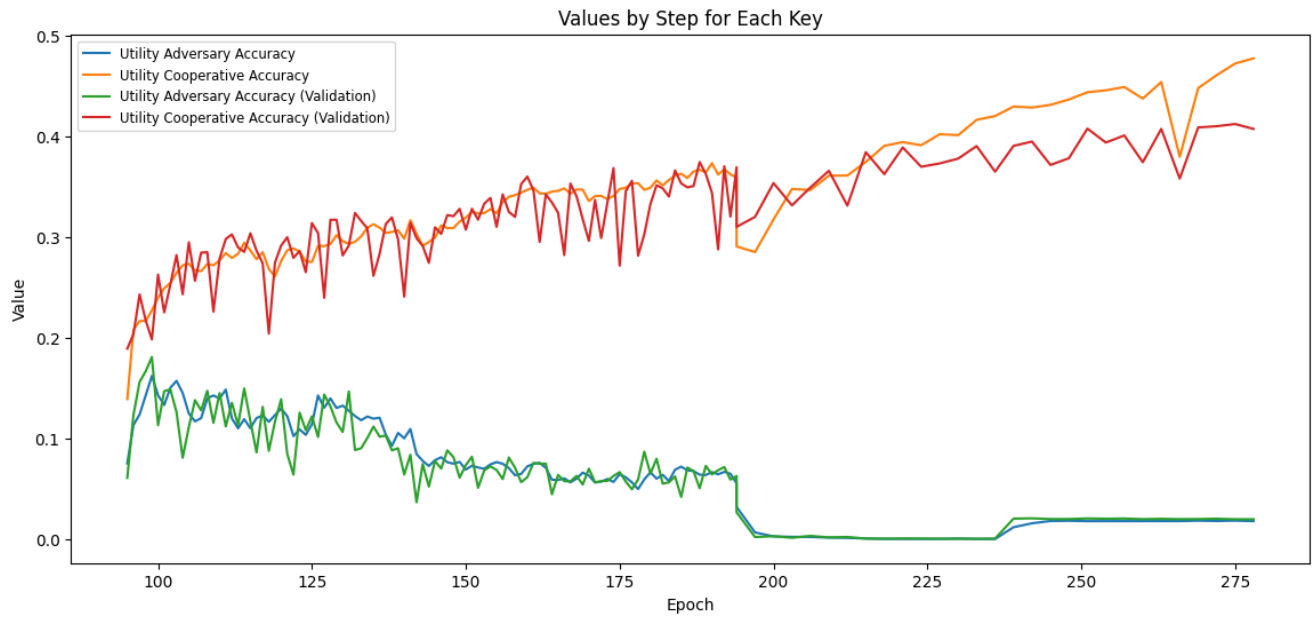

Figure S5. Utility Classifier Accuracy
